# Supplementary material for: primerJinn – a tool for rationally designing multiplex PCR primer sets and in silico PCR
Source: Research Square preprint supplement (doi:10.21203/rs.3.rs-3025970/v1), 2023-06-26
Supplement: Supplementary file 1 [file 3eeb8be5f45ff51d79d8db79.docx]

**primerJinn – a tool for rationally designing multiplex PCR primer sets and in silico PCR.**

Jason D Limberis1*, John Z Metcalfe1

1Division of Pulmonary and Critical Care Medicine, Zuckerberg San Francisco General Hospital and Trauma Centre, University of California, San Francisco, San Francisco, CA, USA


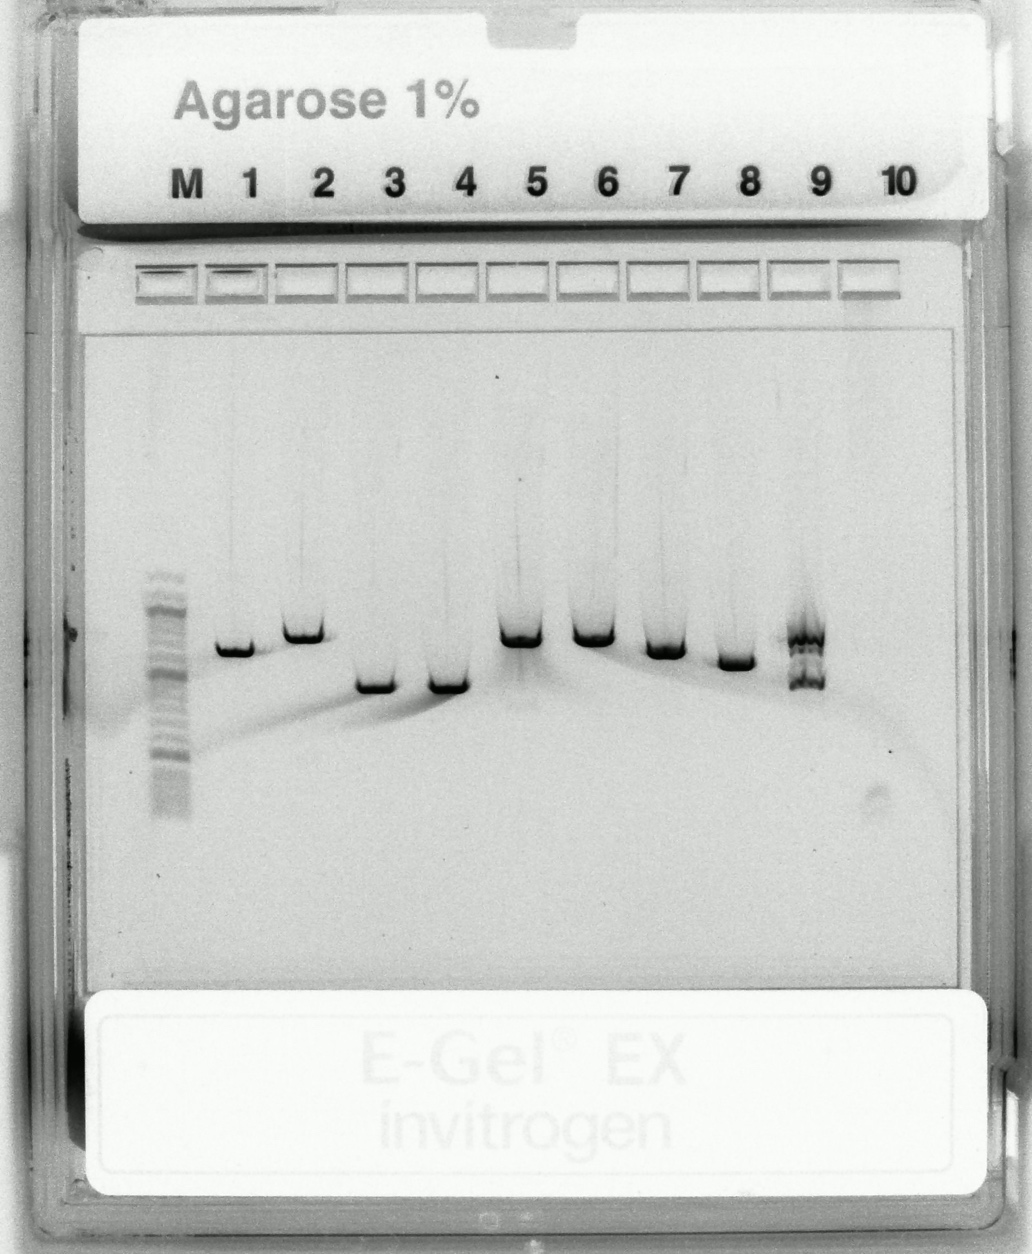


**Figure S1: Uncropped electrophoresis gel as shown in Figure 1.**
